# Supplementary material
Source: publisher site journal article supplement (https://static.cambridge.org/content/id/urn:cambridge.org:id:article:S1368980019001691/resource/name/S1368980019001691supp001.docx)
Supplement: Supplementary file 1 [file S1368980019001691supp001.docx]

Appendix 1. Distribution of infants in study population by MCH clinics

| Identifying number of MCH clinic | Number of infants in study population registered at each clinic | Percent |
| --- | --- | --- |
| 1 | 1933 | 35.6 |
| 2 | 1059 | 19.5 |
| 3 | 659 | 12.1 |
| 4 | 662 | 12.2 |
| 5 | 467 | 8.6 |
| 6 | 423 | 7.8 |
| 7 | 93 | 1.7 |
| 8 | 58 | 1.1 |
| 9 | 42 | 0.8 |
| 10 | 16 | 0.3 |
| 11 | 9 | 0.2 |
| 12 | 5 | 0.1 |
| Total | 5426 | 100.0 |
